# Supplementary material for: Tetragonal Cu2Se nanoflakes: synthesis using selenated propylamine as Se source and activation of Suzuki and Sonogashira cross coupling reactions
Source: Royal Society of Chemistry journal article supplement (doi:10.1039/c4dt03320e), 2014-10-31
Supplement: c4dt03320e1.pdf [file c4dt03320e1.pdf]

Electronic Supporting Information  
For

**Tetragonal Cu<sub>2</sub>Se nanoflakes: Synthesis using selenated propylamine as Se source and activation of Suzuki and Sonogashira cross coupling reactions**

Ved Vati Singh and Ajai Kumar Singh\*

Department of Chemistry, Indian Institute of Technology Delhi, New Delhi-110016, India

Email: [aksingh@chemistry.iitd.ac.in](mailto:aksingh@chemistry.iitd.ac.in)

**S1. SEM and EDX analysis**

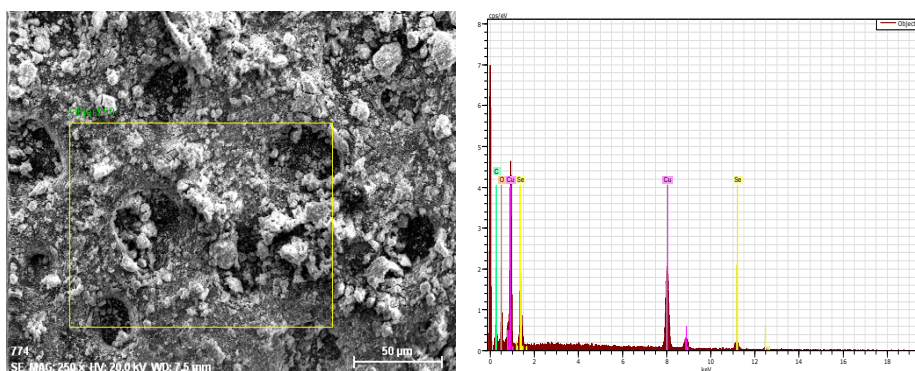

Fig. S1 SEM image and EDX analysis of Cu<sub>2</sub>Se nanoflakes.

**S2. Spectroscopic data of coupled products of Suzuki cross coupling reactions<sup>1</sup>**

**1. 4-Phenylbenzaldehyde (light yellow solid)**

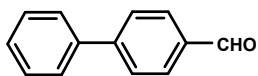

<sup>1</sup>H NMR (300 MHz, CDCl<sub>3</sub>): δ 7.551 (m, 3H), 7.689 (m, 2H), 7.820 (d, J = 8.4 Hz, 2H), 7.953 (d, J = 7.2 Hz, 2H), 9.971 (s, 1H). (Table 3, Entry 1b)

**2. 4-Nitrobiphenyl** (Pale yellow solid)

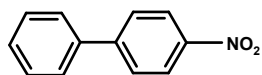

$^1\text{H NMR}$  (300 MHz,  $\text{CDCl}_3$ ):  $\delta$  7.463 (m, 3H), 7.664 (d,  $J = 8.4$  Hz, 2H), 7.692 (d,  $J = 8.4$  Hz, 2H), 8.105 (d,  $J = 8.7$  Hz, 2H). (Table 3, Entry 2b)

**3. 4-Phenylbenzonitrile** (pale yellow solid)

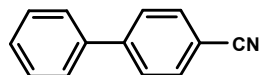

$^1\text{H NMR}$  (300 MHz,  $\text{CDCl}_3$ ):  $\delta$  7.397–7.370 (m, 3H, aromatic), 7.478–7.416 (m, 2H, aromatic), 7.544–7.529 (m, 4H, aromatic). (Table 3, Entry 3b)

**4. 4-Acetylbiphenyl** (white solid)

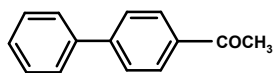

$^1\text{H NMR}$  (300 MHz,  $\text{CDCl}_3$ ):  $\delta$  2.619 (s, 3H), 7.387–7.346 (m,  $J = 8.1$  Hz, 3H), 7.468 (t, 2H), 7.637–7.622 (m, 2H), 7.853 (d,  $J = 8.5$  Hz, 2H). (Table 3, Entry 4b)

**5. Biphenyl-4-carboxylic acid** (White solid)

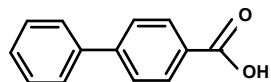

$^1\text{H NMR}$  (300 MHz, DMSO):  $\delta$  7.391–7.471 (m, 3H), 7.731 (d,  $J = 7.5$  Hz, 2H), 7.786 (d,  $J = 8.5$  Hz, 2H), 8.051 (d,  $J = 8.3$  Hz, 2H) (Table 3, Entry 5b)

**6. Biphenyl** (white solid)

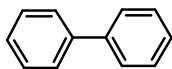

$^1\text{H NMR}$  (300 MHz,  $\text{CDCl}_3$ ):  $\delta$  7.364 (t,  $J = 7.8$  Hz, 2H), 7.491 (t,  $J = 7.7$  Hz, 4H), 7.793 (d,  $J = 7.9$  Hz, 4H). (Table 3, Entry 6b)

7. **4-Methylbiphenyl** (colorless solid)

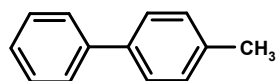

$^1\text{H NMR}$  (300 MHz,  $\text{CDCl}_3$ ):  $\delta$  2.341 (s, 3H), 7.248 (d, 2H), 7.286–7.271 (m, 1H), 7.409–7.414 (m, 2H), 7.492 (d,  $J = 8.8$  Hz, 2H), 7.653–7.641 (m, 2H). (Table 3, Entry 7b)

**S3. Spectroscopic data of coupled products of Sonogashira cross coupling reactions<sup>2</sup>**

1. **4-(phenylethynyl)benzaldehyde** (light yellow solid)

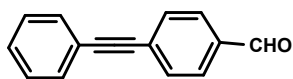

$^1\text{H NMR}$  (300 MHz,  $\text{CDCl}_3$ ):  $\delta$  7.243–7.387 (m, 3H), 7.583–7.505 (m, 2H), 7.680 (d,  $J = 8.4$  Hz, 2H), 7.845 (d,  $J = 8.1$  Hz, 2H), 9.959 (s, 1H). (Table 3, Entry 1c)

2. **1-Nitro-4-(phenylethynyl)benzene** (yellow solid)

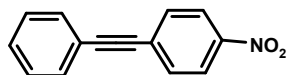

$^1\text{H NMR}$  (300 MHz,  $\text{CDCl}_3$ ):  $\delta$  7.374 – 7.275 (m, 3H), 7.532 (m, 2H), 7.670 (d,  $J = 8.8$  Hz, 2H), 8.111 (d,  $J = 8.8$  Hz, 2H). (Table 3, Entry 2c)

3. **4-(phenylethynyl)benzonitrile** (light yellow solid)

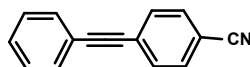

$^1\text{H NMR}$  (300 MHz,  $\text{CDCl}_3$ ):  $\delta$  7.289–7.257 (m, 2H), 7.412–7.366 (m, 2H), 7.479 (d,  $J = 7.5$  Hz, 2H), 7.494 (d,  $J = 7.5$  Hz, 2H). (Table 3, Entry 3c)

4. **4-(phenylethynyl)acetophenone** (white solid)

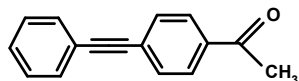

$^1\text{H NMR}$  (300 MHz,  $\text{CDCl}_3$ ):  $\delta$  2.061 (s, 3H), 7.22 (m, 3H), 7.385 (d,  $J = 8.5$  Hz, 2H), 7.557 (m, 2H), 7.636 (d,  $J = 8.5$  Hz, 2H). (Table 3, Entry 4c)

**5. 4-(phenylethynyl)benzoic acid (White solid)**

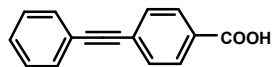

$^1\text{H NMR}$  (300 MHz, DMSO-d,  $\delta$  ppm): 13.18 (s, 1H), 7.391–7.372 (m, 3H), 7.571–7.559 (m, 2H), 7.674 (d,  $J = 4.8$  Hz, 2H), 7.961 (d,  $J = 5.7$  Hz, 2H). (Table 3, Entry 5c)

**6. 1,2 Diphenylethyne (white solid)**

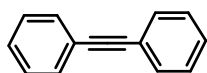

$^1\text{H NMR}$  (300 MHz,  $\text{CDCl}_3$ ):  $\delta$  7.407–7.358 (m, 6H), 7.569–7.555 (d, 4H). (Table 3, Entry 6c)

**7. 1-Methyl-4-(phenylethynyl) benzene (colorless solid)**

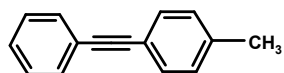

$^1\text{H NMR}$  (300 MHz,  $\text{CDCl}_3$ ):  $\delta$  2.336 (s, 3H), 7.089 (d,  $J = 7.5$  Hz, 2H), 7.235 (d,  $J = 7.7$  Hz, 2H), 7.397 (d,  $J = 7.1$  Hz, 3H), 7.579 (d, 2H), (Table 3, Entry 7c)

#### S4. References:

1. (a) J. Yang, D. Wang, W. Liu, Xi Zhang, F. Bian, W. Yu, *Green Chem.*, 2013, **15**, 3429–3437; (b) V. V. Singh, U. Kumar, S. N. Tripathi and A. K. Singh, *Dalton Trans.*, 2014, **43**, 12555–12563; (c) G. K. Rao, A. Kumar, J. Ahmed and A. K. Singh, *Chem. Commun.*, 2010, **46**, 5954–5956; (d) N. Sakai, N. Takahashi, D. Inoda, R. Ikeda and T. Konakahara, *Molecules* 2013, **18**, 12488–12499.
2. (a) A. Elangovan, Y-H Wang, and T-I Ho, *Org. Lett.*, 2003, **5**, 1841–1844; (b) H. Huang, H. Jiang, K. Chen, and H. Liu, *J. Org. Chem.* 2008, **73**, 9061–9064; (c) S. Thorand and N. Krause, *J. Org. Chem.* 1998, **63**, 8551–8553; (d) M. Maity and U. Maitra, *J. Mat. Chem. A*, Accepted Manuscript, DOI: 10.1039/c0xx00000x; (e) Y-S Feng , X-Y Lin , J, Haob , H-J Xu, *Tetrahedron* 2014, **70**, 5249–5253; (f) X-Y Zhu, Y, Wang, F, Bai, G-W Gao, and J, Men, *ARKIVOC*, 2011, **10**, 99–106.
